# Supplementary material for: Performance of Bio-Rad and Limiting Antigen Avidity Assays in Detecting Recent HIV Infections Using the Quebec Primary HIV-1 Infection Cohort
Source: PLoS One. 2016 May 25;11(5):e0156023. doi: 10.1371/journal.pone.0156023 (PMC4880343; doi:10.1371/journal.pone.0156023)
Supplement: S1 Table — N = 123 treatment-naive and 27 treatment-experienced patients for a total of 577 specimens. (XLSX) [file pone.0156023.s001.xlsx]

## Sheet: MDRI
		S1 Table. Spreadsheet with Sedia-LAg-Avidity and CDC-modified Bio-Rad-Avidity data (Quebec Primary HIV-1 Infection Cohort) for MDRI estimation. N= 123 treattment-naive and 27 treatment experienced patients for a total of 577 specimens.
		#specimens	Days post seroconversion	Bio-Rad/AI	Sedia/Odn	ART naive
		1001	167	3.361	1.15100	1
		1002	182	4.174	1.44500	1
		1003	209	6.968	1.92400	1
		1004	266	9.918	2.38314	1
		1005	160	9.469	3.27003	1
		1006	188	16.789	3.55401	1
		1007	251	23.100	4.19338	1
		1008	349	57.980	4.46516	1
		1009	82	26.245	2.05314	1
		1010	152	37.303	2.57005	1
		1011	180	49.149	2.97262	1
		1012	271	100.00	3.33655	1
		1013	65	93.300	2.54882	1
		1014	149	100.00	2.51617	1
		1015	240	100.00	2.62307	1
		1016	336	100.00	2.36146	1
		1017	64	11.200	1.02773	1
		1018	106	8.800	1.71778	1
		1019	134	9.300	2.23165	1
		1020	233	12.010	3.63538	1
		1021	121	10.950	1.84800	1
		1022	149	4.252	2.10000	1
		1023	177	3.861	1.91800	1
		1024	303	9.350	2.59474	1
		1025	138	2.789	1.81000	1
		1026	173	3.967	2.68400	1
		1027	211	4.050	2.55473	1
		1028	334	12.850	2.74260	1
		1029	73	6.183	0.60438	0
		1030	123	7.400	2.26917	0
		1031	151	29.900	2.99837	0
		1032	242	71.800	3.15334	0
		1033	145	27.330	1.24000	1
		1034	173	57.734	1.35300	1
		1035	250	83.300	1.64100	1
		1036	334	89.518	1.42600	1
		1037	169	18.425	2.18800	1
		1038	184	21.305	2.05030	1
		1039	219	29.665	2.30473	1
		1040	338	28.315	3.34467	1
		1041	129	4.007	0.53467	1
		1042	164	6.974	0.83975	1
		1043	178	7.688	0.85824	1
		1044	234	19.872	1.34515	1
		1045	211	14.138	0.46687	1
		1046	296	2.811	1.30663	1
		1047	155	3.840	1.54600	1
		1048	198	5.150	2.17456	1
		1049	221	6.129	2.31657	1
		1050	364	14.361	2.79586	1
		1051	69	31.331	3.15825	0
		1052	128	28.754	2.91561	0
		1053	184	31.300	3.12799	0
		1054	247	33.100	3.18987	0
		1055	89	19.465	2.60064	0
		1056	149	29.585	2.80193	0
		1057	177	37.695	3.09984	0
		1058	212	46.990	3.09018	0
		1059	59	12.676	0.23002	1
		1060	101	14.819	0.28956	1
		1061	178	3.540	0.52862	1
		1062	234	4.400	0.72222	1
		1063	119	53.442	1.69029	1
		1064	150	41.515	1.89985	1
		1065	199	50.470	1.92200	1
		1066	255	59.102	2.41632	1
		1067	69	9.100	1.79293	1
		1068	125	65.230	2.50070	1
		1069	188	69.758	2.85513	1
		1070	323	82.209	2.79184	1
		1071	86	24.600	0.62290	0
		1072	124	16.600	1.53367	0
		1073	243	46.900	2.59775	0
		1074	338	55.421	2.82982	0
		1075	127	6.933	1.97200	1
		1076	135	4.562	2.27109	1
		1077	222	18.391	3.17704	1
		1078	309	27.889	3.55325	1
		1079	76	12.449	1.88269	0
		1080	134	15.313	2.48383	0
		1081	167	17.104	3.23027	0
		1082	265	24.399	3.37359	0
		1083	167	3.532	0.79800	1
		1084	201	4.340	1.00300	1
		1085	208	5.379	1.17600	1
		1086	250	12.001	1.97300	1
		1087	89	4.493	0.18357	1
		1088	132	5.613	0.89211	1
		1089	216	10.213	2.04026	1
		1090	279	18.100	2.22705	1
		1091	103	14.782	2.48325	1
		1092	162	11.610	2.82616	1
		1093	223	16.455	3.54067	1
		1094	285	69.608	4.21212	1
		1095	99	9.074	2.36683	1
		1096	138	9.842	2.53907	1
		1097	221	15.587	3.68900	1
		1098	363	14.242	3.95056	1
		1099	121	3.577	2.84924	1
		1100	177	3.518	2.57123	1
		1101	212	3.376	3.54633	1
		1102	303	3.308	3.31397	1
		1103	72	22.078	0.08441	1
		1104	175	5.538	0.11874	1
		1105	223	7.135	0.31187	1
		1106	341	8.372	0.36481	1
		1107	127	14.025	2.79945	1
		1108	157	26.530	3.46154	1
		1109	219	98.009	4.02615	1
		1110	310	98.999	4.32000	1
		1111	130	36.270	2.80462	0
		1112	158	68.508	3.05846	0
		1113	212	81.173	3.15385	0
		1114	296	91.721	3.46769	0
		1115	100	7.409	0.23569	1
		1116	166	7.900	0.36869	1
		1117	249	33.300	0.53030	1
		1118	61	4.099	0.65177	0
		1119	104	4.073	1.27273	0
		1120	132	4.870	1.41294	0
		1121	108	9.240	1.66184	1
		1122	150	14.096	2.08535	1
		1123	213	28.590	3.64412	1
		1124	94	2.946	1.12481	1
		1125	142	5.442	2.55717	1
		1126	171	4.430	2.88517	1
		1127	211	7.147	3.11962	1
		1128	170	7.997	1.10100	1
		1129	212	6.315	3.57100	1
		1130	226	7.565	3.23345	1
		1131	282	64.046	3.55749	1
		1132	129	3.849	1.58900	1
		1133	155	4.348	2.27385	1
		1134	211	4.969	3.04000	1
		1135	303	4.230	3.59077	1
		1136	113	3.630	0.76200	1
		1137	141	4.780	1.15200	1
		1138	162	10.300	2.04769	1
		1139	281	18.030	2.52154	1
		1140	123	3.213	1.57800	1
		1141	166	3.779	2.02200	1
		1142	207	6.854	2.16183	1
		1143	292	10.014	2.70263	1
		1144	122	4.657	0.88900	1
		1145	151	4.853	1.90600	1
		1146	178	6.780	1.87500	1
		1147	198	7.663	2.02000	1
		1148	170	92.959	3.92915	1
		1149	212	96.566	4.07890	1
		1150	254	99.489	4.18357	1
		1151	338	99.237	4.50242	1
		1152	130	2.560	1.27700	1
		1153	172	2.589	1.85100	1
		1154	228	6.592	2.25385	1
		1155	305	6.290	2.35846	1
		1156	44	2.439	0.24499	1
		1157	150	4.778	1.39137	1
		1158	187	2.734	1.31895	1
		1159	325	3.530	1.59630	1
		1160	67	8.047	0.20034	1
		1161	111	5.100	0.99495	1
		1162	138	17.000	1.96465	1
		1163	165	28.100	2.65541	1
		1164	105	4.388	2.27113	1
		1165	147	8.329	4.08612	1
		1166	196	5.309	5.17863	1
		1167	231	7.880	5.41786	1
		1168	48	4.095	0.30971	1
		1169	76	5.100	2.16615	1
		1170	136	6.500	3.73538	1
		1171	170	10.140	3.91077	1
		1172	141	16.480	2.06657	1
		1173	171	18.500	2.47041	1
		1174	199	25.462	2.55473	1
		1175	255	35.315	3.06953	1
		1176	139	3.380	1.65000	1
		1177	174	2.180	2.26331	1
		1178	223	2.700	2.46450	1
		1179	396	3.880	3.37574	1
		1180	80	20.236	1.09728	1
		1181	111	29.680	1.17024	1
		1182	125	46.817	1.84219	1
		1183	161	55.450	2.84541	1
		1184	61	4.835	1.67172	1
		1185	160	4.600	3.07454	1
		1186	244	46.800	3.67792	1
		1187	328	48.600	3.72996	1
		1188	90	3.806	1.39775	1
		1189	146	6.330	2.90821	1
		1190	202	9.700	3.31401	1
		1191	342	40.705	4.39936	1
		1192	94	3.391	0.52234	1
		1193	112	5.633	0.52234	1
		1194	126	5.315	0.66102	1
		1195	140	6.733	0.83821	1
		1196	90	16.555	0.41224	0
		1197	160	6.454	0.40986	0
		1198	223	9.534	0.27581	0
		1199	293	13.605	0.18336	0
		1200	145	74.049	2.42899	1
		1201	200	89.857	2.69822	1
		1202	248	86.353	2.73373	1
		1203	327	79.447	2.49852	1
		1204	88	6.536	0.25465	1
		1205	158	7.007	0.28898	1
		1206	247	12.192	0.57368	1
		1207	331	30.446	0.88984	1
		1208	66		0.11864	0
		1209	268	5.202	0.23267	0
		1210	359	6.510	0.25886	0
		1211	128	3.910	1.16200	0
		1212	163	4.651	1.82300	0
		1213	192	5.708	1.89100	0
		1214	317	9.641	2.69538	0
		1215	103	18.846	1.48228	1
		1216	145	10.295	1.83975	1
		1217	218	59.001	2.83892	1
		1218	307	77.202	3.56459	1
		1219	103	9.904	1.68567	1
		1220	145	11.878	2.86284	1
		1221	220	14.325	0.00478	1
		1222	304	52.910	3.11962	1
		1223	138	17.100	3.15976	1
		1224	165	22.445	3.30621	1
		1225	195	28.510	3.79734	1
		1226	333	44.460	4.00148	1
		1227	149	16.150	1.99700	1
		1228	196	33.180	2.50444	1
		1229	210	40.585	2.69527	1
		1230	364	69.231	3.36538	1
		1231	96	6.570	0.52013	1
		1232	159	21.730	1.21095	1
		1233	194	28.800	1.47021	1
		1234	361		2.86795	1
		1235	169	13.615	3.03310	0
		1236	218	25.180	3.25087	0
		1237	253	70.868	3.33449	0
		1238	358	99.424	3.73171	0
		1239	130	5.135	0.92500	1
		1240	161	6.873	1.13500	1
		1241	242	13.915	2.11077	1
		1242	319	19.676	2.15385	1
		1243	170	100.000	4.92683	1
		1244	212	100.000	4.99303	1
		1245	255	99.795	5.54181	1
		1246	365	100.000	5.68641	1
		1247	55	7.942	1.68352	0
		1248	139	14.508	1.74225	0
		1249	307	30.405	3.42154	0
		1250	335	36.459	3.71846	0
		1251	171	11.719	1.06400	1
		1252	185	11.331	1.27300	1
		1253	248	16.254	1.66600	1
		1254	360	52.850	2.47189	1
		1255	170	5.906	0.22600	1
		1256	211	4.474	0.38200	1
		1257	253	5.301	0.63800	1
		1258	282	6.421	0.67200	1
		1259	72	4.860	0.68526	0
		1260	128	10.068	1.70815	0
		1261	184	16.821	2.41345	0
		1262	289	26.746	2.34478	0
		1263	116	2.443	0.16179	0
		1264	158	3.207	0.88598	0
		1265	200	4.107	1.90139	0
		1266	235	13.256	2.46058	0
		1267	40	16.002	4.12000	1
		1268	125	31.913	4.45000	1
		1269	243	32.500	4.74000	1
		1270	335	67.258	4.79000	1
		1271	71	5.139	0.26323	0
		1272	155	7.596	0.60658	0
		1273	183	5.187	1.15880	0
		1274	330	8.030	2.63291	0
		1275	60	4.265	0.72881	1
		1276	131	13.035	2.18182	1
		1277	235	18.625	2.18000	1
		1278	334	26.549	2.34000	1
		1279	55	4.640	0.09951	1
		1280	139	15.591	2.27273	1
		1281	250	41.028	2.46000	1
		1282	334	44.352	2.93692	1
		1283	134	2.329	1.48700	1
		1284	162	2.881	1.88100	1
		1285	217	7.113	2.83077	1
		1286	342	6.506	2.75538	1
		1287	104	4.772	1.77042	1
		1288	161	16.579	1.99846	1
		1289	218	59.730	3.09544	1
		1290	301	99.065	3.73029	1
		1291	98	9.507	0.75809	1
		1292	154	8.515	1.41140	1
		1293	188	11.500	2.01435	1
		1294	273	18.350	2.58692	1
		1295	75	11.556	2.00000	1
		1296	156	35.714	2.94515	1
		1297	184	39.222	3.22644	1
		1298	234	64.128	3.87342	1
		1299	46	3.550	1.64407	0
		1300	160	30.800	2.24154	0
		1301	228	60.950	2.83846	0
		1302	312	81.080	2.96462	0
		1303	49	14.200	0.11746	1
		1304	161	8.400	0.81077	1
		1305	236	12.500	1.79935	1
		1306	290	10.300	3.04000	1
		1307	121	97.081	4.43430	1
		1308	148	100.000	4.32227	1
		1309	205	100.000	4.49101	1
		1310	310	100.000	4.12586	1
		1311	163	14.265	2.32230	1
		1312	198	15.300	2.46167	1
		1313	226	15.900	2.51045	1
		1314	300	16.590	2.81707	1
		1315	203	14.170	1.89522	1
		1316	266	14.150	1.88906	1
		1317	160	5.080	0.52900	1
		1318	195	7.400	0.69700	1
		1319	257	12.050	0.93600	1
		1320	349	17.550	1.89100	1
		1321	162	7.795	1.38200	1
		1322	190	10.089	1.61900	1
		1323	204	12.008	1.81000	1
		1324	265	16.210	2.91124	1
		1325	106	9.675	2.17427	1
		1326	155	19.692	2.73167	1
		1327	257	8.010	3.51867	1
		1328	285	10.635	3.74274	1
		1329	86	4.391	2.09984	1
		1330	141	10.192	3.66667	1
		1331	177	16.737	3.99034	1
		1332	206	24.965	4.35588	1
		1333	157	13.892	2.79965	1
		1334	255	16.210	3.01568	1
		1335	318	30.325	3.25436	1
		1336	353	61.800	3.02091	1
		1337	170	14.950	2.75261	0
		1338	219	14.450	3.12718	0
		1339	266	15.850	3.45645	0
		1340	323	14.150	3.40244	0
		1341	170	5.179	1.18200	1
		1342	189	4.254	1.68300	1
		1343	219	4.717	1.64900	1
		1344	344	9.330	2.26183	1
		1345	139	3.244	1.61997	0
		1346	187	3.302	1.74074	0
		1347	223	3.692	1.90821	0
		1348	286	5.043	1.89211	0
		1349	170	17.730	2.37631	1
		1350	183	17.063	2.40767	1
		1351	210	19.400	2.39024	1
		1352	292	8.715	2.47038	1
		1353	106	6.180	2.23188	1
		1354	155	55.370	3.35427	1
		1355	222	80.150	4.30596	1
		1356	377	9.850	4.80354	1
		1357	124	5.984	2.22268	1
		1358	138	6.690	2.26833	1
		1359	182	8.428	2.64039	1
		1360	239	10.716	3.20747	1
		1361	138	2.756	1.45800	1
		1362	174	3.042	2.27959	1
		1363	202	3.603	2.61538	1
		1364	342	8.500	3.09467	1
		1365	91	3.539	2.23188	1
		1366	146	8.115	3.78100	1
		1367	174	17.114	3.81320	1
		1368	363	44.980	5.07407	1
		1369	94	11.817	0.63636	1
		1370	149	4.718	1.12943	1
		1371	212	6.258	2.44019	1
		1372	289	7.303	3.15152	1
		1373	182	7.705	2.23629	1
		1374	208	9.989	2.30661	1
		1375	292	14.957	2.97890	1
		1376	108	6.960	0.72757	1
		1377	211	12.300	1.88091	1
		1378	220	18.100	0.78630	1
		1379	267	22.100	2.79538	1
		1380	74	6.588	2.24332	1
		1381	93	7.580	2.72011	1
		1382	122	9.000	2.64979	1
		1383	139	24.713	2.72996	1
		1384	110	5.960	0.98390	1
		1385	208	8.830	2.62641	1
		1386	350	18.930	3.04348	1
		1387	71	6.966	0.56223	1
		1388	132	7.224	1.03004	1
		1389	188	9.121	1.50787	1
		1390	133	14.300	1.00000	1
		1391	196	6.600	1.94943	1
		1392	282	9.000	2.42615	1
		1393	98	6.511	2.73846	0
		1394	113	7.906	1.35237	0
		1395	164	22.065	2.59231	0
		1396	42	5.019	0.40216	1
		1397	83	7.350	1.31279	1
		1398	155	43.580	2.87538	1
		1399	218	72.799	3.33000	1
		1400	79	7.659	0.46781	1
		1401	137	51.947	2.56844	1
		1402	236	98.115	3.19807	1
		1403	298	100.000	3.93881	1
		1404	52	7.958	0.51876	1
		1405	94	8.513	1.36868	1
		1406	141	9.900	2.34615	1
		1407	176	17.330	3.12923	1
		1408	70	3.389	0.51010	1
		1409	139	14.875	2.27286	1
		1410	200	16.206	3.07876	1
		1411	342	51.984	3.93390	1
		1412	48	11.202	0.30179	1
		1413	149	71.730	0.33846	1
		1414	261	60.321	2.09231	1
		1415	345	73.678	2.36769	1
		1416	53	5.346	0.25285	1
		1417	79	8.877	0.50897	1
		1418	95	7.817	0.64111	1
		1419	28	2.414	0.79815	0
		1420	91	4.251	1.02928	0
		1421	56	2.353	0.98921	0
		1422	112	5.716	1.41757	0
		1423	151	10.380	2.08600	1
		1424	183	16.725	2.30030	1
		1425	208	17.200	2.40237	1
		1426	271	28.741	3.03402	1
		1427	104	4.771	0.33282	1
		1428	149	4.141	0.45356	1
		1429	216	4.674	0.55728	1
		1430	275	8.230	1.34977	1
		1431	98	3.482	1.31079	0
		1432	150	4.992	2.07890	0
		1433	212	7.186	2.75040	0
		1434	194	6.730	1.40600	0
		1435	226	4.029	1.70100	0
		1436	289	4.262	1.59700	0
		1437	383	6.081	1.17400	0
		1438	88	15.495	1.12160	1
		1439	169	43.722	2.16315	1
		1440	207	54.257	2.39944	1
		1441	288	60.537	2.94093	1
		1442	114	3.810	0.67180	1
		1443	159	13.275	1.05855	1
		1444	207	47.350	2.04160	1
		1445	291	94.661	2.81051	1
		1446	166	19.620	2.48462	1
		1447	225	28.854	2.65077	1
		1448	327	90.899	3.34154	1
		1449	145	6.100	1.82126	1
		1450	210	8.537	2.43478	1
		1451	358	29.440	4.31723	1
		1452	136	6.488	2.02000	0
		1453	172	10.235	2.52769	0
		1454	222	14.301	2.56308	0
		1455	363	21.540	2.75077	0
		1456	207	9.806	0.65200	1
		1457	294	17.133	1.53000	1
		1458	340	25.325	1.60200	1
		1459	100	5.353	1.41919	1
		1460	130	6.300	1.62121	1
		1461	270	75.700	3.61603	1
		1462	360	100.000	4.08579	1
		1463	119	7.949	1.23232	1
		1464	189	16.784	2.28956	1
		1465	255	28.074	2.89170	1
		1466	339	37.383	3.07032	1
		1467	105	3.320	1.51926	1
		1468	145	12.365	2.89474	1
		1469	204	65.176	3.62201	1
		1470	299	94.271	3.96172	1
		1471	87	2.884	0.47987	1
		1472	152	2.838	1.52496	1
		1473	164	3.173	1.68599	1
		1474	325	29.300	2.98712	1
		1475	76	16.369	1.03863	1
		1476	154	28.804	1.62232	1
		1477	183	39.374	2.03720	1
		1478	232	37.595	2.41707	1
		1479	153	9.179	2.30435	1
		1480	204	17.592	2.98068	1
		1481	205	14.320	2.98551	1
		1482	348	20.725	3.93559	1
		1483	86	5.987	2.13849	1
		1484	128	17.333	2.42673	1
		1485	191	69.117	3.20934	1
		1486	352	96.731	4.36554	1
		1487	159	12.299	2.38153	1
		1488	194	15.675	2.48258	1
		1489	229	18.165	2.90941	1
		1490	302	29.390	3.41463	1
		1491	170	64.516	2.28180	1
		1492	177	73.536	3.25604	1
		1493	261	93.230	3.86957	1
		1494	345	96.783	4.02738	1
		1495	119	2.878	1.61800	1
		1496	149	2.950	2.38866	1
		1497	163	3.250	2.60028	1
		1498	184	4.512	3.13970	1
		1499	139	24.200	1.45500	1
		1500	180	42.435	1.58500	1
		1501	222	61.600	1.84200	1
		1502	313	89.230	2.43787	1
		1503	67	13.062	0.80303	1
		1504	126	40.692	1.73401	1
		1505	176	55.300	2.29114	1
		1506	356	78.185	3.69902	1
		1507	146	6.980	1.82300	0
		1508	160	9.252	2.04290	0
		1509	188	9.798	2.27071	0
		1510	293	27.630	3.65089	0
		1511	154	3.959	1.55800	1
		1512	197	4.946	1.93000	1
		1513	212	5.908	2.01775	1
		1514	273	23.330	3.36243	1
		1515	166	53.007	2.65505	0
		1516	194	61.185	3.00523	0
		1517	256	74.750	3.15679	0
		1518	353	87.233	3.49477	0
		1519	99	4.051	0.47612	1
		1520	144	5.605	1.55624	1
		1521	204	7.807	1.53929	1
		1522	277	9.955	1.27889	1
		1523	106	4.747	0.92142	1
		1524	155	4.438	1.44068	1
		1525	203	5.592	2.07396	1
		1526	307	4.370	3.25035	1
		1527	68	6.642	1.10943	1
		1528	96	4.950	2.53834	1
		1529	110	4.795	2.81240	1
		1530	215	25.147	4.71126	1
		1531	88	11.979	2.60338	1
		1532	123	14.385	2.69620	1
		1533	68	13.500	1.36195	1
		1534	89	100.000	3.55387	1
		1535	103	100.000	3.33474	1
		1536	117	94.263	3.19550	1
		1537	185	24.650	2.36653	1
		1538	224	65.200	2.73721	1
		1539	248	74.797	2.72891	1
		1540	192	7.814	4.27367	1
		1541	212	8.483	4.33136	1
		1542	291	18.110	4.61834	1
		1543	354	25.075	4.72633	1
		1544	111	4.729	2.25116	1
		1545	153	6.219	2.54772	1
		1546	188	9.124	2.93361	1
		1547	295	24.300	3.58921	1
		1548	164	12.130	1.09200	1
		1549	192	18.075	1.66300	1
		1550	241	9.653	2.39199	1
		1551	290	8.525	2.66202	1
		1552	107	77.880	3.08299	0
		1553	137	85.400	3.09129	0
		1554	204		4.04149	0
		1555	355	96.772	3.26833	0
		1556	131	5.120	0.42600	1
		1557	159	4.759	0.63500	1
		1558	264	5.682	2.06769	1
		1559	327	5.402	2.59692	1
		1560	82	3.795	2.05958	1
		1561	159	4.650	2.27053	1
		1562	215	5.130	2.28824	1
		1563	292	5.500	2.48953	1
		1564	117	27.720	1.18336	0
		1565	154	78.425	1.88598	0
		1566	230	79.900	3.56570	0
		1567	377	89.788	3.91840	0
		1568	59	4.973	0.79293	1
		1569	119	19.600	2.77977	1
		1570	171	34.300	3.60196	1
		1571	318	100.000	4.69984	1
		1572	148	13.315	3.70209	1
		1573	162	14.002	3.64251	1
		1574	103	8.677	0.47920	1
		1575	157	8.643	1.56086	1
		1576	199	9.275	2.19723	1
		1577	312	61.702	2.98340	1
